# Supplementary material for: Prediction of psychiatric rehospitalization among a predominantly Hispanic population receiving services at a community mental health center
Source: Springer Nature journal article supplement (doi:10.1186/s12888-023-04911-9), 2000-01-01
Supplement: MOESM1 [file 25440690]

**Figures S1a and S1b:** The receiver operating characteristic (ROC) curves with respective area under the curve (AUC)

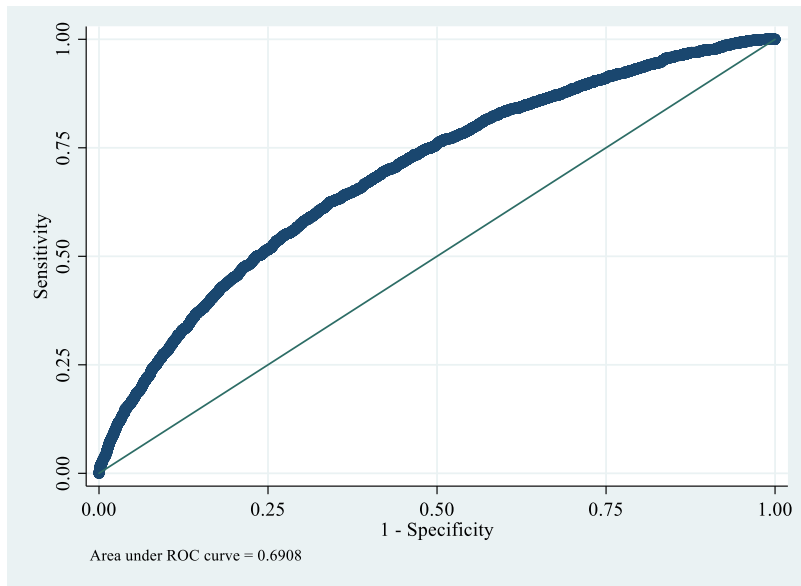

a; Outcome: Depressive symptoms

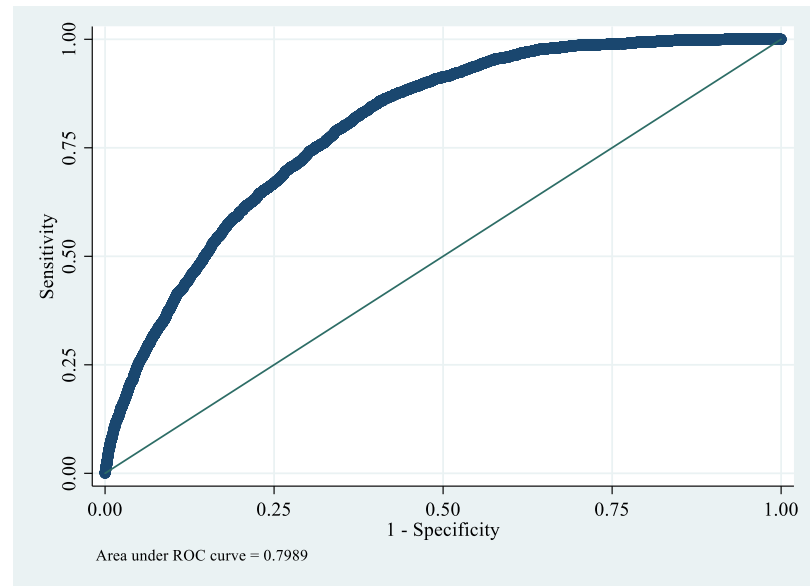

b; Outcome: Cognitive impairment

**Figures S2a and S2b:** Plots of residuals against fitted values (close to zero variation of mean of the residuals (y-axis) against fitted values (x-axis) of predictors suggests no violation of linearity)

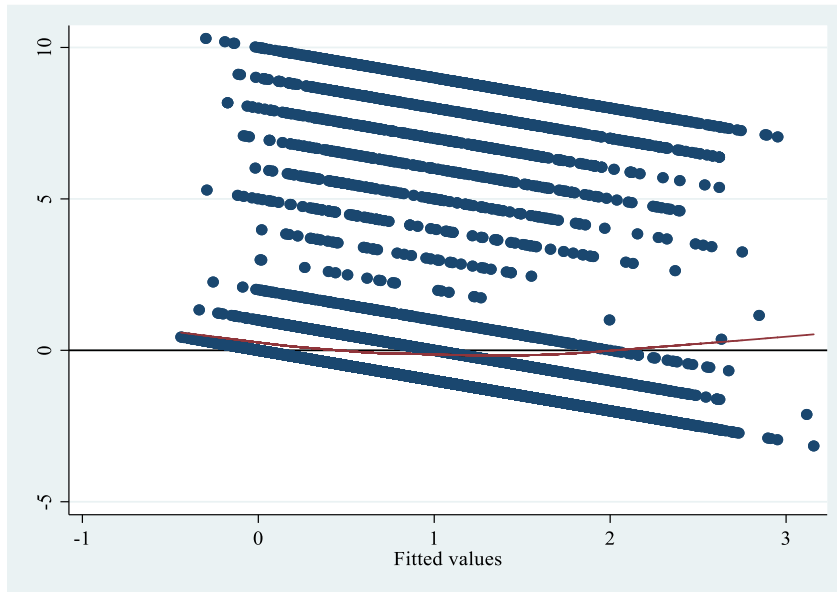

a; Outcome: Depressive symptoms

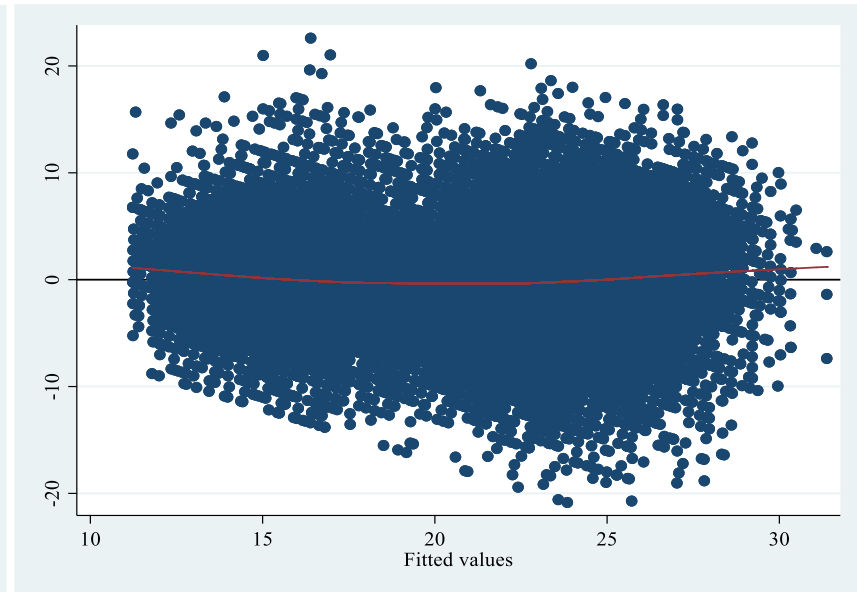

b; Outcome: Cognitive impairment

**Figures S3a and S3b:** Quantile-quantile plots showing the normality of the residuals

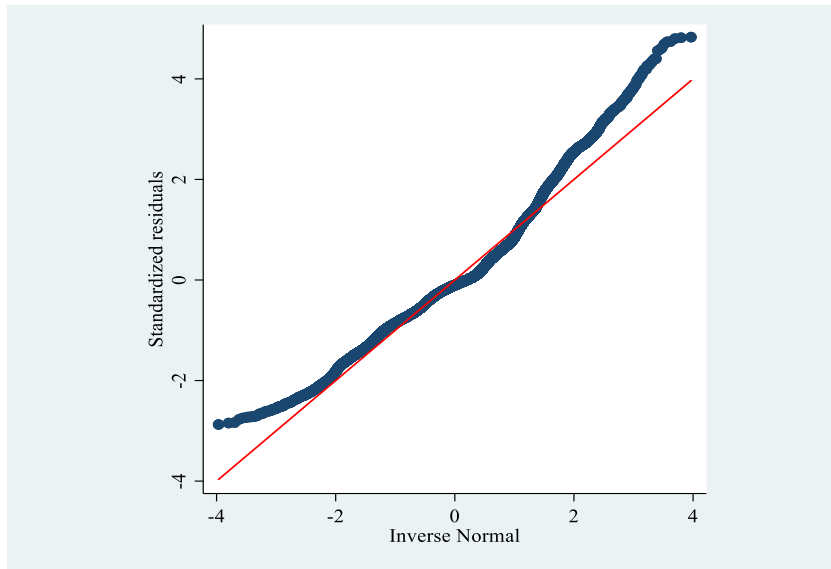

a; Outcome: Depressive symptoms

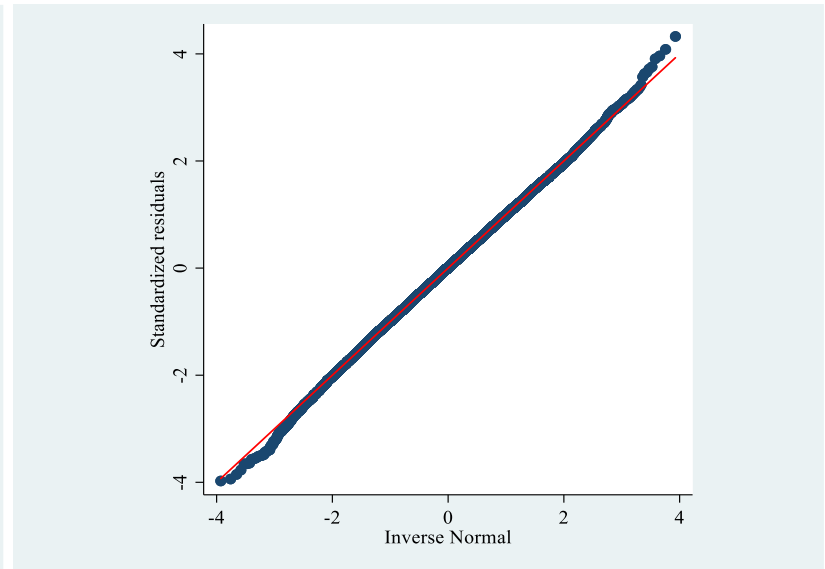

b; Outcome: Cognitive impairment

**Table S1:** VIF estimates for the selected explanatory variables

| <b>Variables</b>           | <b>Sub-categories</b> | <b>VIF</b> | <b>1/VIF</b> |
|----------------------------|-----------------------|------------|--------------|
| <b>Age (years)</b>         | 60-69                 |            |              |
|                            | 70-79                 | 1.09       | 0.918416     |
|                            | 80+                   | 1.12       | 0.89233      |
| <b>Sex</b>                 | Male                  |            |              |
|                            | Female                | 1.29       | 0.773771     |
| <b>Marital status</b>      | Currently in union    |            |              |
|                            | Widowed               | 1.54       | 0.649921     |
|                            | Others                | 1.06       | 0.939649     |
| <b>Living arrangements</b> | Living alone          |            |              |
|                            | With spouse           | 4.98       | 0.200711     |
|                            | Others                | 4.57       | 0.219032     |
| <b>Educational status</b>  | No/ primary           |            |              |
|                            | Secondary             | 1.23       | 0.812354     |
|                            | Higher                | 1.3        | 0.767886     |
| <b>Self-rated health</b>   | Good                  |            |              |
|                            | Poor                  | 1.04       | 0.962564     |
| <b>MPCE quintile</b>       | Poorest               |            |              |
|                            | Poorer                | 1.65       | 0.606985     |
|                            | Middle                | 1.69       | 0.590296     |
|                            | Richer                | 1.74       | 0.574321     |
|                            | Richest               | 1.87       | 0.533453     |
| <b>Religion</b>            | Hindu                 |            |              |
|                            | Muslim                | 1.07       | 0.931678     |
|                            | Others                | 1.39       | 0.720581     |
| <b>Caste</b>               | SC/ST                 |            |              |
|                            | OBC                   | 1.64       | 0.610384     |
|                            | Others                | 1.72       | 0.580249     |
| <b>Place of residence</b>  | Urban                 |            |              |
|                            | Rural                 | 1.23       | 0.810669     |
| <b>Region</b>              | North                 |            |              |
|                            | Central               | 1.62       | 0.618253     |
|                            | East                  | 1.67       | 0.5983       |
|                            | Northeast             | 1.64       | 0.609578     |
|                            | West                  | 1.97       | 0.50786      |
|                            | South                 | 1.47       | 0.678217     |
| Mean VIF                   |                       | 1.73       |              |
